# Supplementary material for: Evaluation of breath, plasma, and urinary markers of lactose malabsorption to diagnose lactase non-persistence following lactose or milk ingestion
Source: PubMed Central journal article supplement (PMC7325051; doi:10.1186/s12876-020-01352-6), 2020-06-29

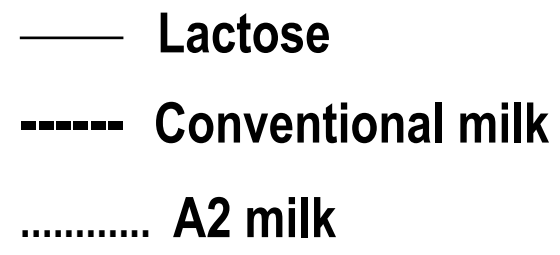

### Breath H2

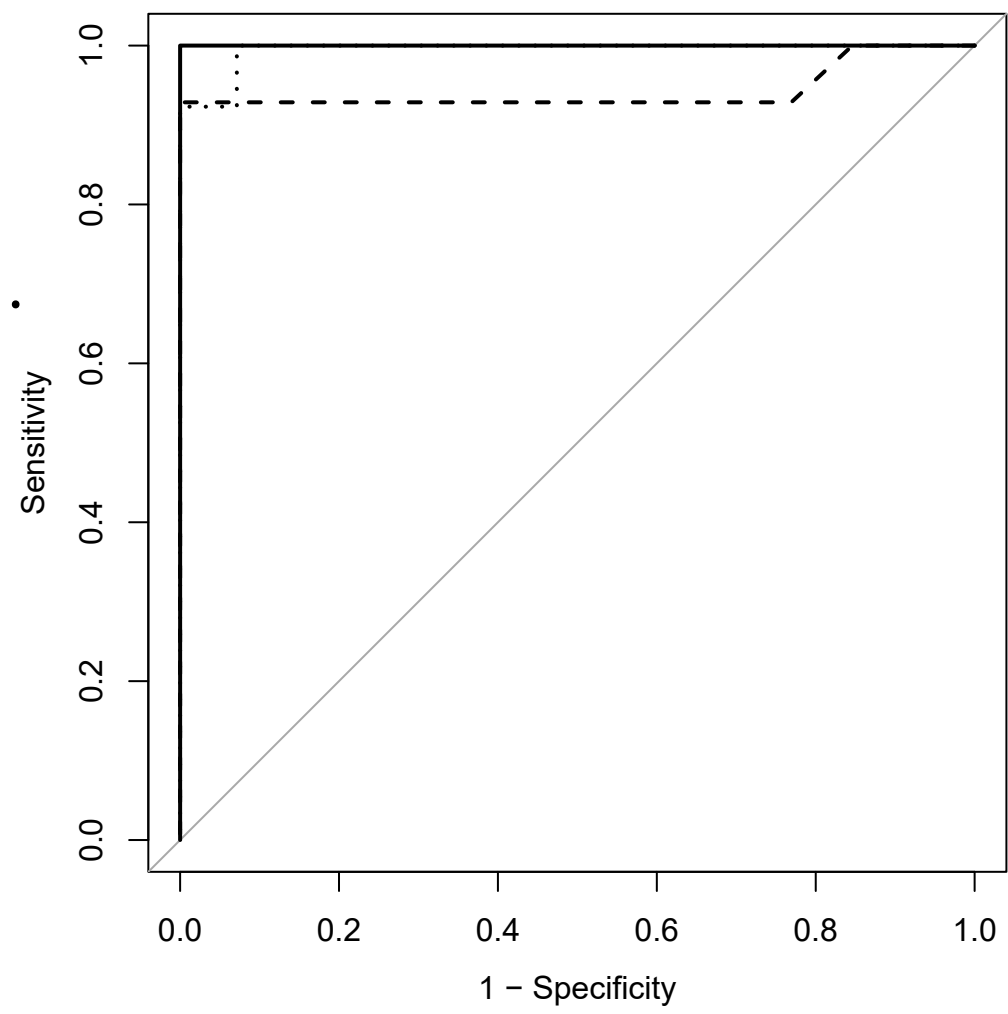

### Plasma glucose

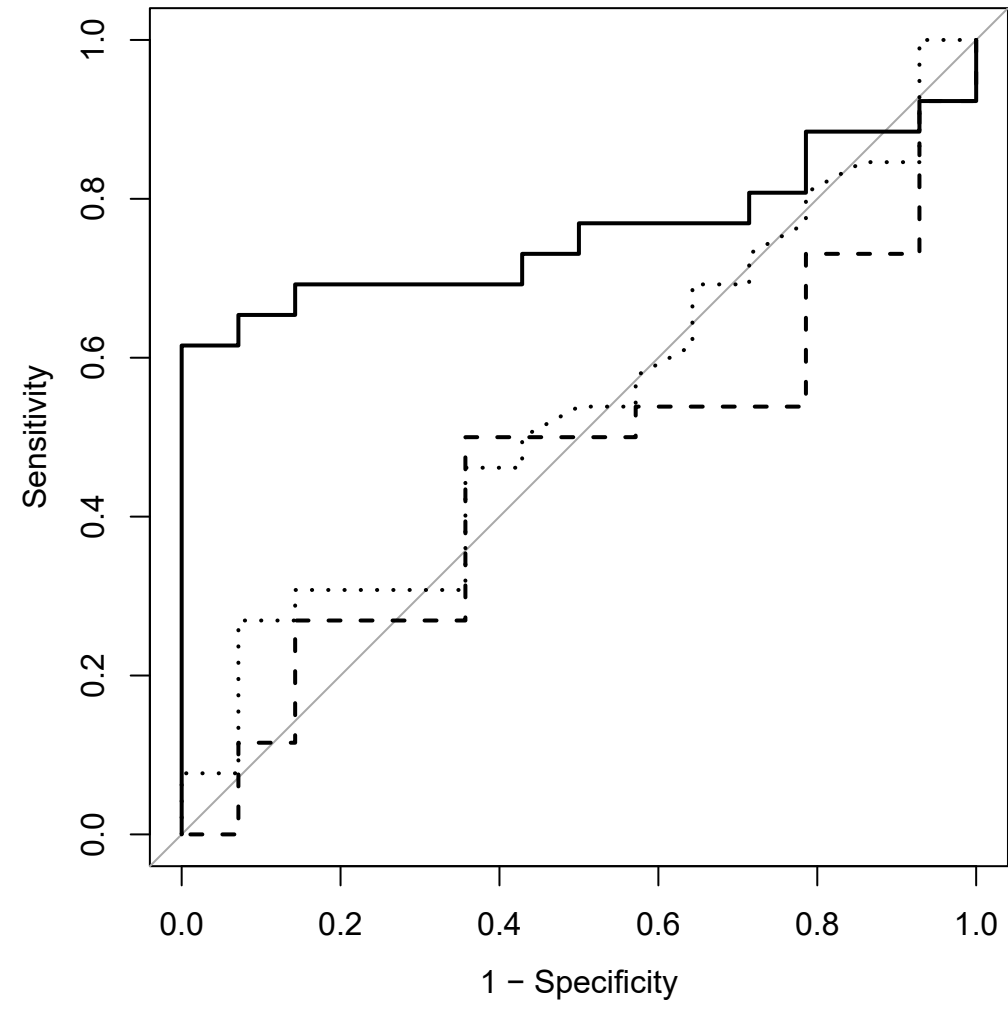

### Urinary galactose/creatinine

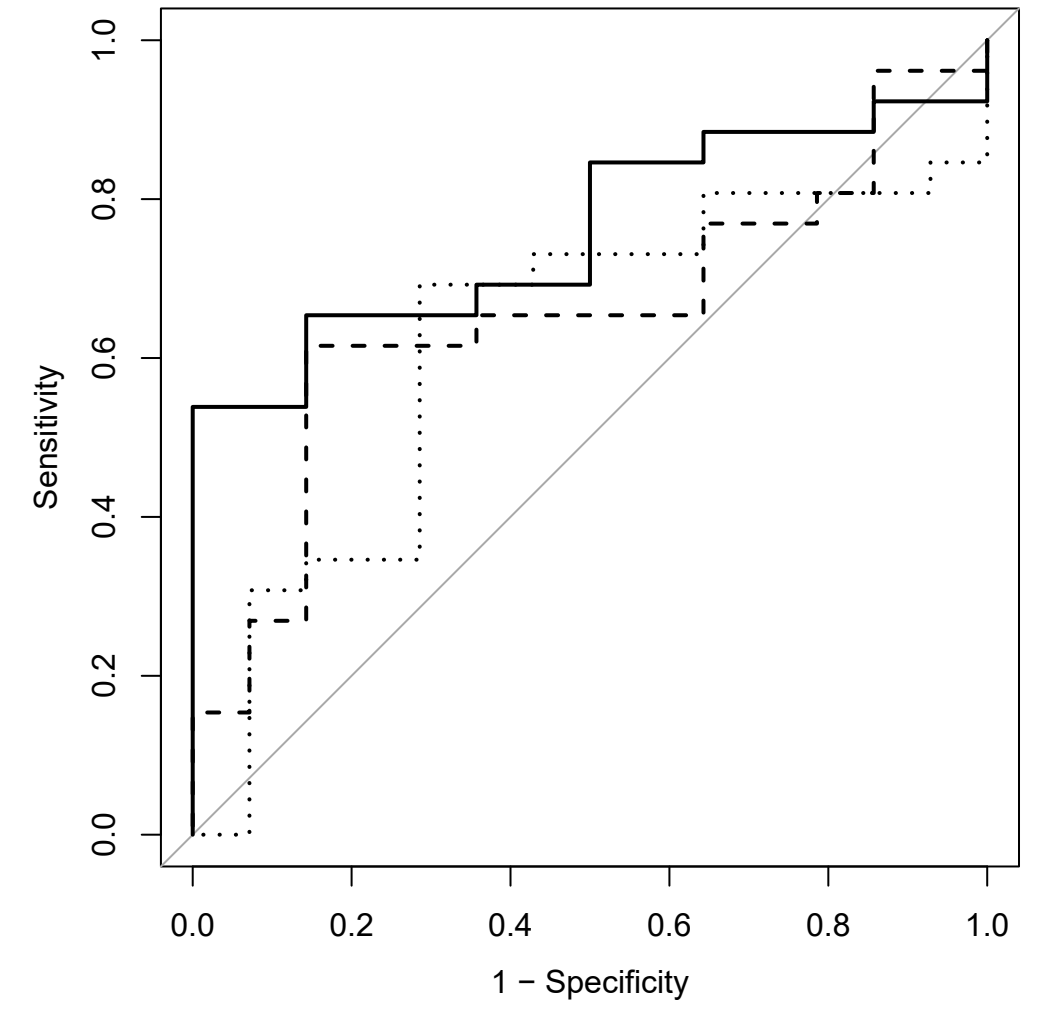

Supplement: 12876_2020_1352_MOESM3_ESM.pdf [file 12876_2020_1352_MOESM3_ESM.pdf]
